# Supplementary material for: Gut-associated lymphoid tissue attrition associates with response to anti-α4β7 therapy in ulcerative colitis
Source: PubMed Central journal article supplement — bioRxiv. 2023 Jan 20:2023.01.19.524731. Preprint. [Version 1] doi: 10.1101/2023.01.19.524731 (PMC9882272; doi:10.1101/2023.01.19.524731), 2023-01-20
Supplement: NIHPP2023.01.19.524731v1-supplement-1.pdf [file NIHPP2023.01.19.524731v1-supplement-1.pdf]

Supplementary materials

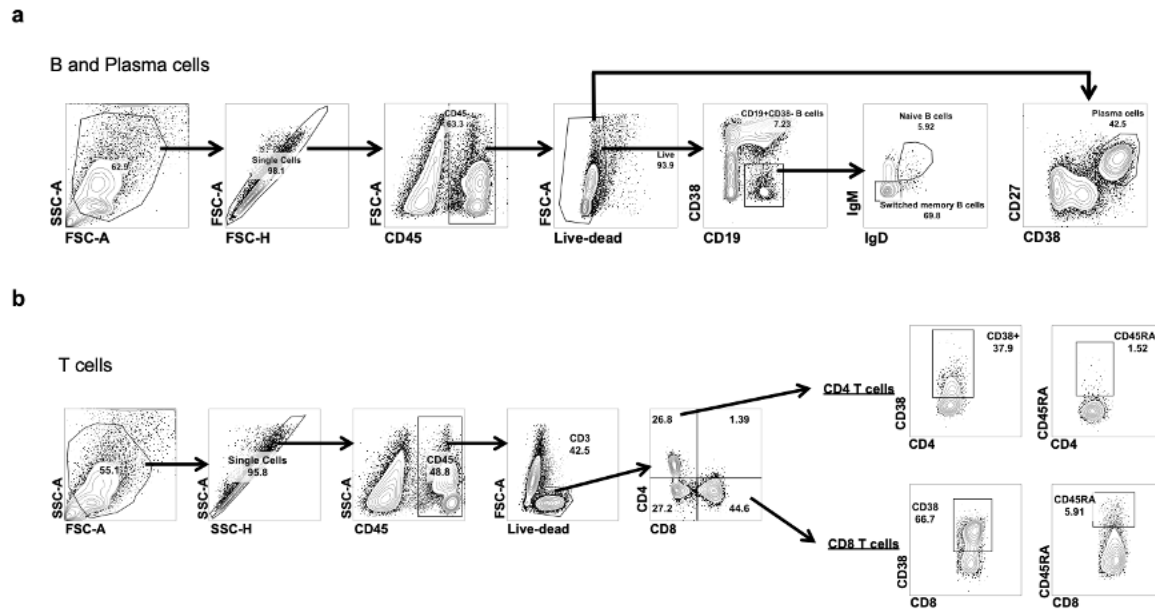

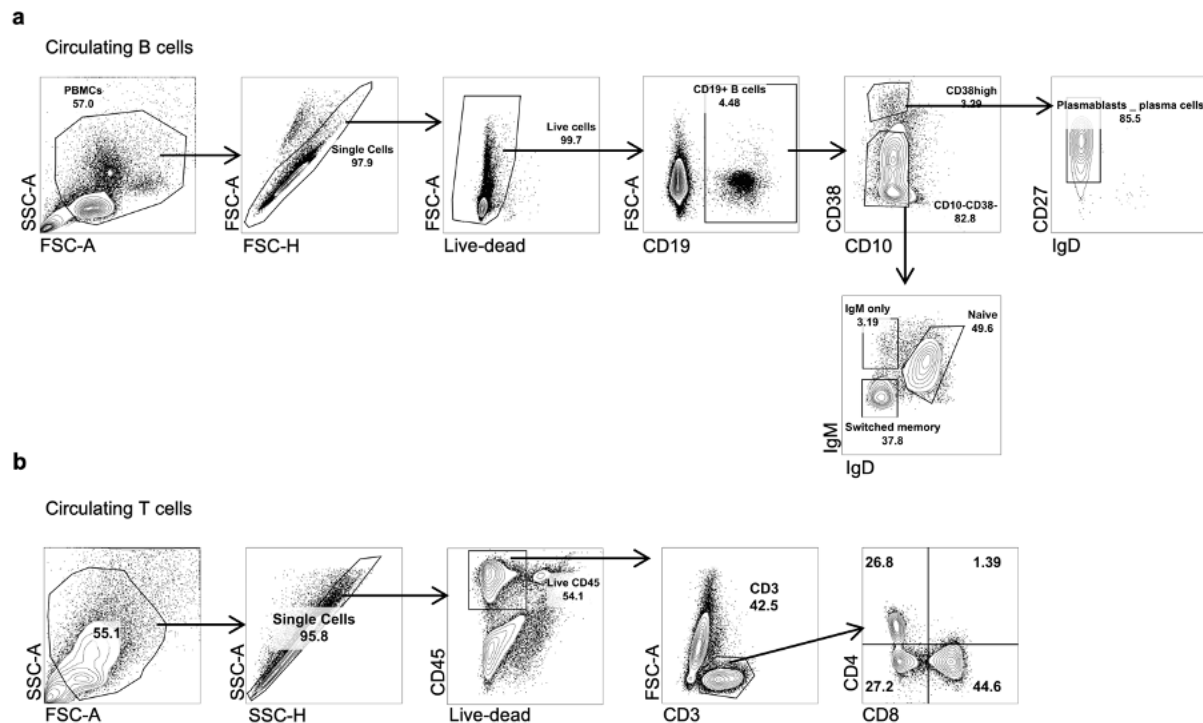

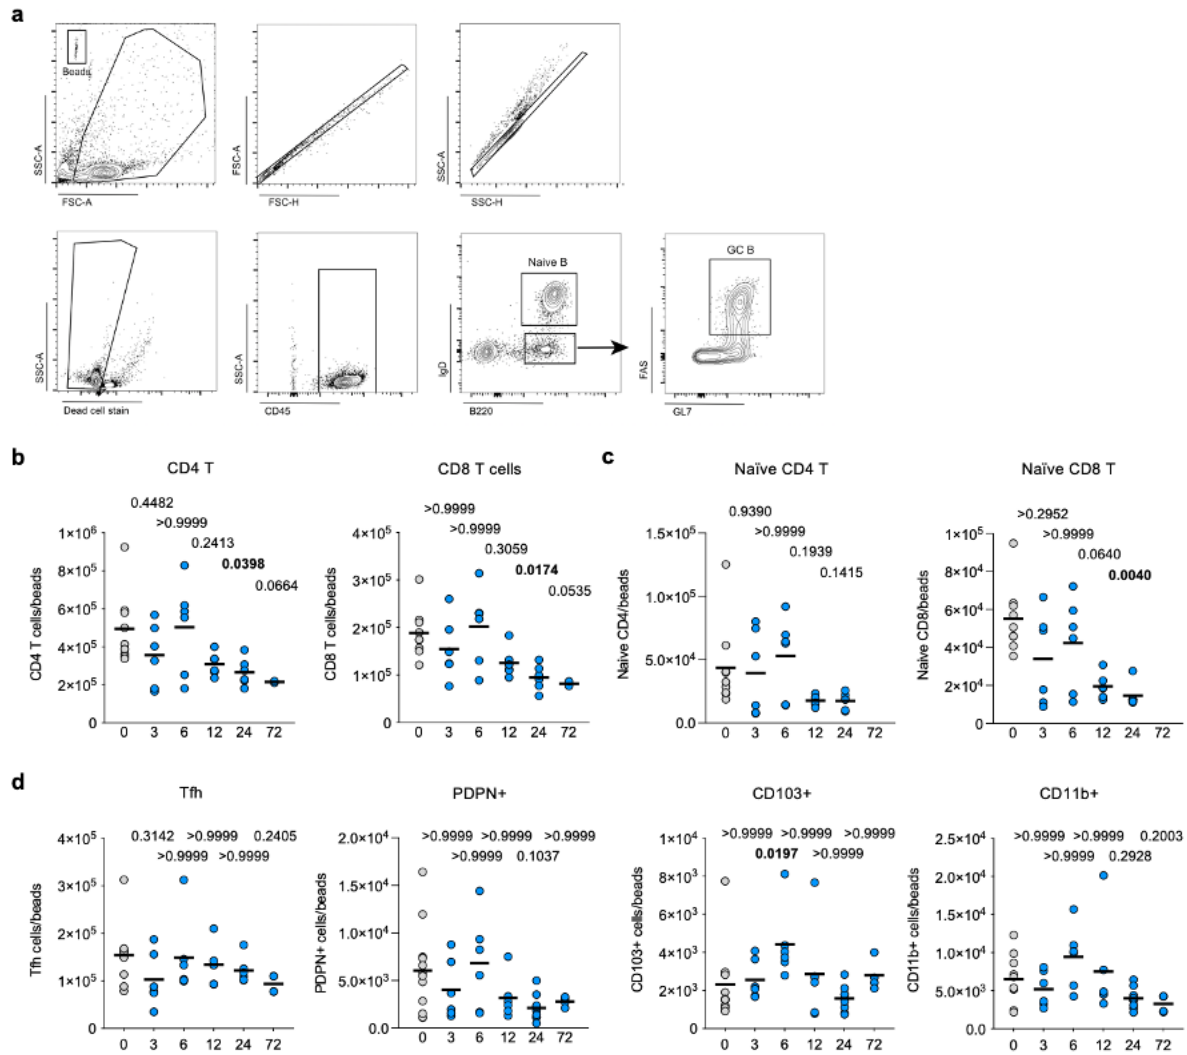

**Figure S3. Kinetic profiling of mouse PPs after anti- $\alpha 4\beta 7$  administration**

**a**, Representative flow cytometry (FC) plots showing gating strategy used to profile mouse B cells. **b**, Frequency of CD4 T cells and CD8 T cells from isolated PPs of untreated mice (grey) and at 3, 6, 12, 24 and 72 hours after anti- $\alpha 4\beta 7$  administration. **c**, Frequency of Naive CD4 and CD8 T cells after anti- $\alpha 4\beta 7$  administration. **d**, Frequency of T follicular helper, PDPN+, CD103+ and CD11b+ cells after anti- $\alpha 4\beta 7$  administration. Data shown as individual values and mean. Unpaired non-parametric analysis was done using Kruskal-Wallis test and Dunn's multiple comparisons test. The *p* values are indicated.

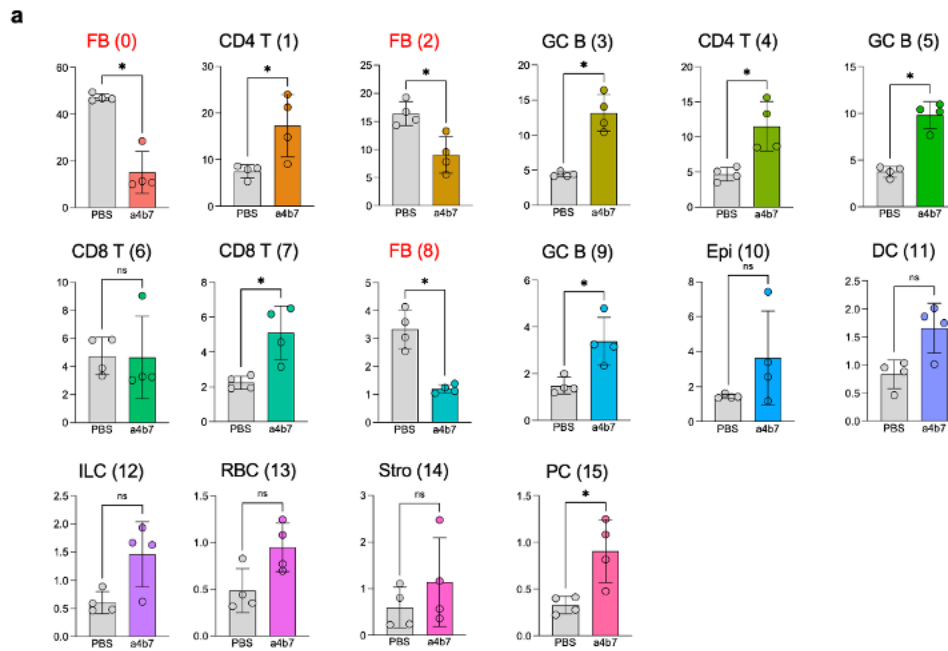

**Figure S4. Frequency of single-cell RNAseq clusters**

**a**, Bar plots for the frequency of cell clusters among total cells from Figure 4. Data shown as individual values and mean. Unpaired analysis was done using Mann Whitney test.

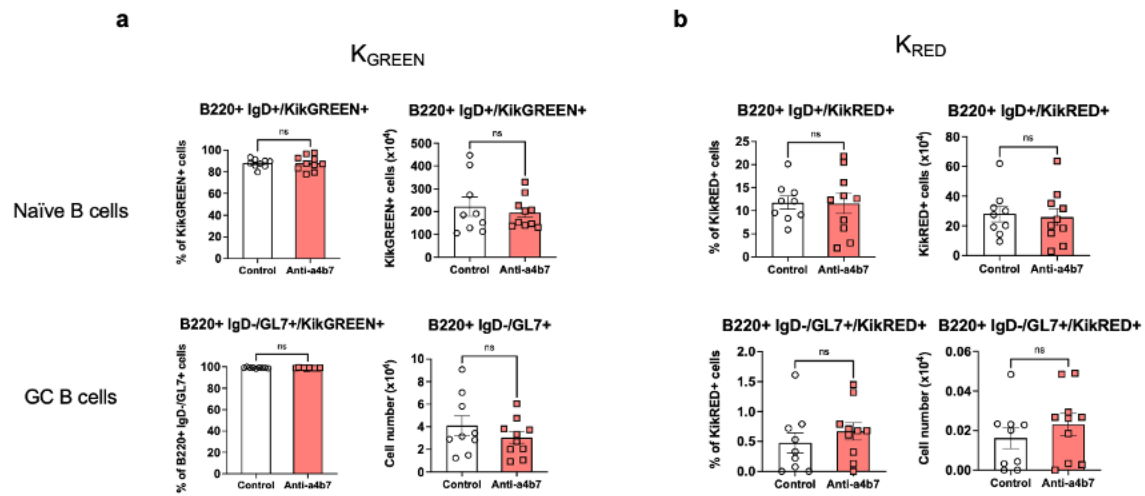

**Figure S5. B cell monitoring in mesenteric lymph nodes after photoconversion**

Cell frequency and absolute cell number of  $K_{GREEN}$  (a) and  $K_{RED}$  (b) Naïve B cells and GC B cells from non-photoconverted mesenteric lymph nodes. Mice were treated with anti- $\alpha 4\beta 7$  or Isotype control as in Figure 5. Data shown as individual values, mean and SD. Unpaired analysis was done using Mann Whitney test.

**Table S1. COHORT 1 (Mount Sinai) used for flow cytometry studies.**

|                             | <b>Vedolizumab treated</b> | <b>TNFi treated</b> | <b>Untreated</b> | <b>p-value</b> |
|-----------------------------|----------------------------|---------------------|------------------|----------------|
| Number of patients          | 56                         | 10                  | 17               | NA             |
| Age (mean $\pm$ SD)         | 38.39 $\pm$ 13.43          | 29.94 $\pm$ 9.72    | 40.92 $\pm$ 19.1 | 0.15           |
| Sex, n M / F                | 29 / 27                    | 15 / 7              | 13 / 4           | 0.01           |
| Disease activity/extent*, n |                            |                     |                  |                |
| Not active                  | 3                          | 2                   | 3                |                |
| E1                          | 5                          | 1                   | 5                |                |
| E2                          | 22                         | 4                   | 6                |                |
| E3                          | 26                         | 3                   | 3                | 0.1            |

\*extent of active disease at time of endoscopy

SD = Standard deviation. Age is at the time of first biopsy analyzed. For continuous variables used One-way ANOVA, for categorical variables used Chi-square test for trend.

**Table S2. COHORT 2 (Mount Sinai) used for histology studies**

|                    | <b>Vedolizumab responder</b> | <b>Vedolizumab non-responder</b> | <b>p-value</b> |
|--------------------|------------------------------|----------------------------------|----------------|
| Number of patients | 12                           | 22                               | NA             |
| Age (mean ± SD)    | 37.4 ± 17.7                  | 41.5 ± 17.9                      | 0.52           |
| Sex, n M / F       | 4 / 8                        | 15 / 7                           | 0.08           |
| Disease extent, n  |                              |                                  |                |
| E1                 | 0                            | 1                                |                |
| E2                 | 4                            | 10                               |                |
| E3                 | 8                            | 11                               | 0.29           |
| MES (pre), n       |                              |                                  |                |
| 0                  | 0                            | 0                                |                |
| 1                  | 1                            | 0                                |                |
| 2                  | 5                            | 5                                |                |
| 3                  | 3                            | 9                                | 0.09           |
| Unknown            | 3                            | 8                                |                |
| MES (post), n      |                              |                                  |                |
| 0                  | 11                           | 3                                |                |
| 1                  | 1                            | 3                                |                |
| 2                  | 0                            | 7                                |                |
| 3                  | 0                            | 7                                | <0.0001        |
| Unknown            | 0                            | 2                                |                |

|                    | <b>TNF inhibitor responders</b> | <b>TNF inhibitor non-responder</b> | <b>p-value</b> |
|--------------------|---------------------------------|------------------------------------|----------------|
| Number of patients | 11                              | 15                                 | NA             |
| Age (mean ± SD)    | 43.2 ± 17.4                     | 34 ± 13.0                          | 0.20           |
| Sex, n M / F       | 5 / 6                           | 10 / 5                             | 0.43           |
| TNF used           |                                 |                                    |                |
| Infliximab*        | 8                               | 11                                 |                |
| Adalimumab*        | 3                               | 4                                  | >0.99          |
| Disease extent     |                                 |                                    |                |
| E1                 | 0                               | 0                                  |                |
| E2                 | 6                               | 4                                  |                |
| E3                 | 5                               | 11                                 | 0.15           |
| MES (post), n      |                                 |                                    |                |
| 0                  | 5                               | 0                                  |                |
| 1                  | 4                               | 2                                  |                |
| 2                  | 0                               | 2                                  |                |
| 3                  | 0                               | 11                                 | <0.0001        |
| Unknown            | 2                               | 0                                  |                |

\*or biosimilar

SD = Standard deviation; MES = Mayo Endoscopic Score. Age is at the time of first biopsy analyzed. If no in mayo endoscopic score in report, assigned 3 if reported as severe and/or ulcerations. For continuous variables used Mann Whitney test, for categorical variables used Fisher's exact or Chi-square test for trend

**Table S3. COHORT 3 (Validation cohort, Belgium) used for histology studies**

|                    | Vedolizumab responder | Vedolizumab non-responder | p-value |
|--------------------|-----------------------|---------------------------|---------|
| Number of patients | 9                     | 12                        | NA      |
| Age (mean ± SD)    | 50.8 ± 18.36          | 43.27 ± 10.8              | 0.24    |
| Sex, n M / F       | 5 / 4                 | 7 / 5                     | >0.9999 |
| Disease extent, n  |                       |                           |         |
| E1                 | 3                     | 2                         |         |
| E2                 | 5                     | 5                         |         |
| E3                 | 1                     | 5                         | 0.13    |
| MES (pre), n       |                       |                           |         |
| 0                  | 0                     | 0                         |         |
| 1                  | 0                     | 0                         |         |
| 2                  | 1                     | 6                         |         |
| 3                  | 8                     | 6                         | 0.06    |
| Unknown            | 0                     | 0                         |         |
| MES (post), n      |                       |                           |         |
| 0                  | 4                     | 3                         |         |
| 1                  | 3                     | 2                         |         |
| 2                  | 2                     | 1                         |         |
| 3                  | 0                     | 6                         | 0.04    |
| Unknown            | 0                     | 0                         |         |

SD = Standard deviation; MES = Mayo Endoscopic Score. Age is at the time of first biopsy analyzed. If no in mayo endoscopic score in report, assigned 3 if reported as severe and/or ulcerations. For continuous variables used Mann Whitney test, for categorical variables used Fisher's exact or Chi-square test for trend.



**Table S4. Antibodies used for Flow cytometry of human samples.**

| Marker         | Fluorochrome | Manufacturer    | Clone      |
|----------------|--------------|-----------------|------------|
| CD19           | PE.Cy7       | Biolegend       | SJ25C1     |
| CD38           | APC          | Biolegend       | HB-7       |
| CD10           | APC.Cy7      | Biolegend       | HI10a      |
| CD27           | PerCP.Cy5.5  | Biolegend       | O323       |
| IgD            | PB           | Biolegend       | IA6-2      |
| IgM            | A700         | Biolegend       | MHM-88     |
| IgA            | FITC         | SouthernBiotech | Polyclonal |
| Beta7-integrin | PE           | Biolegend       | FIB504     |
| Beta7-integrin | FITC         | Biolegend       | FIB504     |
| CD3            | PB           | Biolegend       | UCHT1      |
| CD4            | A700         | Biolegend       | RPA-T4     |
| CD8            | APC.CY7      | Biolegend       | SK1        |
| CD45RA         | PE.Cy7       | Biolegend       | HI100      |
| TIGIT          | BV605        | Biolegend       | A15153G    |
| ICOS           | APC.Cy7      | Biolegend       | C398.4A    |
| CXCL13         | APC          | Invitrogen      | 53610      |
| PD1            | PE           | Biolegend       | EH12.2H7   |
| PD1            | APC          | Biolegend       | EH12.2H7   |
| CXCR3          | PE           | Biolegend       | G025H7     |
| CCR9           | PE           | Biolegend       | L053E8     |
| CXCR4          | PE           | Biolegend       | 12G5       |

**Table S5. Antibodies used for Flow cytometry of murine samples.**

| <b>Marker</b> | <b>Fluorochrome</b> | <b>Manufacture</b> | <b>Clone</b> |
|---------------|---------------------|--------------------|--------------|
| B220          | Pacific Blue        | Biolegend          | RA3-6B2      |
| B220          | APC                 | Biolegend          | RA3-6B2      |
| CD3           | PerCP cy5.5         | Biolegend          | 17A2         |
| CD3           | Pacific Blue        | Biolegend          | 17A2         |
| CD31          | Alexa fluor488      | Biolegend          | MEC13.3      |
| CD4           | PE-Cy7              | Biolegend          | GK1.5        |
| CD44          | APC                 | Biolegend          | IM7          |
| CD45          | Alexa fluor700      | Biolegend          | 30-F11       |
| CD62L         | PE                  | Biolegend          | MEL-14       |
| CD8           | Alexa fluor488      | Biolegend          | 53-6.7       |
| CXCR5         | BV421               | Biolegend          | L138D7       |
| Epcam         | APC                 | Biolegend          | G8.8         |
| FAS           | FITC                | Biolegend          | SA367H8      |
| GL7           | APC                 | Biolegend          | GL7          |
| IgA           | PE                  | eBioscience        | mA-6E1       |
| IgD           | PerCP cy5.5         | Biolegend          | 11-26c.2a    |
| PD1           | APC                 | Biolegend          | RMP1-30      |
| PDPN          | PE-Cy7              | Biolegend          | 8.1.1        |
